# Supplementary material for: Convolutional Neural Networks Applied to Antimony Quantification via Reflectance Spectroscopy Using Soils from Northern Portugal: Opportunities and Challenges
Source: Preprints.org preprint supplement (doi:10.20944/preprints202402.1438.v1), 2024-02-26
Supplement: Supplementary file 1 [file supplementary]

Supplementary Materials: Convolutional Neural Networks (CNNs) applied to Antimony quantification via reflectance spectroscopy using soils from Northern Portugal: Opportunities and Challenges

Morgana Carvalho 1,2*, Joana Cardoso-Fernandes 1,2 Alexandre Lima1,2 and Ana C. Teodoro1,2

1 Department of Geosciences, Environment and Spatial Planning, Faculty of Sciences, University of Porto, Rua Campo Alegre, 4169-007 Porto, Portugal; joana.fernandes@fc.up.pt (J.C-F.); allima@fc.up.pt (A.L.); amteodor@fc.up.pt (A.C.T.)

2 ICT (Institute of Earth Sciences) – Porto pole (Portugal), Rua Campo Alegre, 4169-007 Porto, Portugal

* morgana.carvalho@fc.up.pt

Spectrogram transformation

The script presented in this section consists of the application of the Short-Time Fourier Transform (STFT) to the equal_length tensor using tf.signal.stft. A new dimension is added to the spectrogram tensor using spectrogram [..., tf.newaxis]. This dimension is added to make the spectrogram suitable as input data with convolution layers in the CNN. The data to be used must be already converted to pickle format and the necessary preprocessing must already be applied. The output is a file in pickle format.

Code S1: Conversion to Spectrogram

1. import pandas as pd

2. import tensorflow as tf

3. import numpy as np

4. import matplotlib.pyplot as plt

5. from scipy.io import wavfile

6. from scipy import signal

7. import pickle

8.

9. # Load the waveform data from a pickle file

10. experiment_name = "test_Tr1"

11. input_file = f'../data/{experiment_name}/sample_matched.pickle'

12. output_file = f'../data/{experiment_name}/spectogram.pickle'

13.

14. with open(input_file, 'rb') as handle:

15. data_dict = pickle.load(handle)

16.

17. # Function to normalize a spectrogram using min-max scaling

18. def normalize_spectrogram(spec):

19. spec_min = np.min(spec)

20. spec_max = np.max(spec)

21. spec_norm = (spec - spec_min) / (spec_max - spec_min)

22. return spec_norm

23.

24. # Function to generate a spectrogram from a waveform

25. def get_spectrogram(waveform):

26. input_len = 2151

27. waveform = waveform[:input_len]

28. zero_padding = tf.zeros([2151] - tf.shape(waveform), dtype=tf.float32)

29. waveform = tf.cast(waveform, dtype=tf.float32)

30. equal_length = tf.concat([waveform, zero_padding], 0)

31. spectrogram = tf.signal.stft(equal_length, frame_length=128, frame_step=64)

32. spectrogram = tf.abs(spectrogram)

33. spectrogram = spectrogram[..., tf.newaxis]

34. return spectrogram

35.

36. # Function to plot a spectrogram

37. def plot_spectrogram(spectrogram, ax):

38. if len(spectrogram.shape) > 2:

39. assert len(spectrogram.shape) == 3

40. spectrogram = np.squeeze(spectrogram, axis=-1)

41. log_spec = np.log(spectrogram.T + np.finfo(float).eps)

42. height = log_spec.shape[0]

43. width = log_spec.shape[1]

44. X = np.linspace(0, np.size(spectrogram), num=width, dtype=int)

45. Y = range(height)

46. ax.pcolormesh(X, Y, log_spec)

47.

48. # Function to visualize waveform and corresponding spectrogram

49. def draw_spec(waveform):

50. spectrogram = get_spectrogram(waveform)

51. fig, axes = plt.subplots(2, figsize=(12, 8))

52. timescale = np.arange(waveform.shape[0])

53. axes[0].plot(timescale, waveform)

54. axes[0].set_title('Waveform')

55. axes[0].set_xlim([0, 2151])

56.

57. spec = normalize_spectrogram(spectrogram.numpy())

58. plot_spectrogram(spec, axes[1])

59. axes[1].set_title('Spectrogram')

60. plt.show()

61.

62. # Function to map waveforms to spectrograms for multiple samples

63. def map_dict_wave_spec(data):

64. o_aux = {}

65. for sample, data in data.items():

66. aux = []

67. for c in data.columns:

68. freq, time, spec = signal.spectrogram(data[c])

69. aux.append(normalize_spectrogram(spec))

70. o_aux[sample] = np.array(aux)

71. return o_aux

72.

73. # Function to map waveforms to spectrograms for a single sample

74. def map_wave_spec(data):

75. o_aux = []

76. for d in data:

77. aux = []

78. for l in d:

79. freq, time, spec = signal.spectrogram(l)

80. aux.append(spec)

81. o_aux.append(aux)

82. return np.array(o_aux)

83.

84. # Generate spectrograms for all samples in the data dictionary

85. specs = map_dict_wave_spec(data_dict)

86.

87. # Save the spectrograms to a pickle file

88. with open(output_file, 'wb') as handle:

89. pickle.dump(specs, handle, protocol=pickle.HIGHEST_PROTOCOL)

Convolutional neural networks

MobileNets are a class of highly efficient CNN models, built upon a streamlined architecture that leverages depth wise separable convolutions, being a deep neural network with significantly reduced computational demand. The spectral input data is in pikcle format, and the input labels must be a csv. The data given as input and labels much match and “experiment_name” must be an already existent file.

Code S2: MobiletNet model

1. import pandas as pd

2. import tensorflow as tf

3. import numpy as np

4. import os

5. import datetime

6. import pickle

7.

8. from sklearn.model_selection import train_test_split

9.

10. from tensorflow.keras import datasets, layers, models

11. import matplotlib.pyplot as plt

12. %matplotlib inline

13.

14. # Experiment name and input paths

15. experiment_name = "experiment_1"

16. input_data = f'../data/{experiment_name}/spectogram.pickle' # Receives spectrograms

17. input_label = f"../data/{experiment_name}/labels.csv" # receive labels (targets)

18.

19. # Load data from pickle files

20. with open(input_data, 'rb') as handle:

21. specs_dict = pickle.load(handle)

22.

23. labels = pd.read_csv(input_label, delimiter=";")

24. GERA LABELS (GENERATE LABELS)

25. print(specs_dict.keys())

26.

27. # Prepare data and labels

28. _labels = labels[["sample", "Sb_ppm"]]

29. specs = []

30. target = []

31.

32. # Loop through labels to create data and target arrays

33. for r in _labels.iterrows():

34. label = [r[1][1]] # Choose what to use, see example

35. spectograms = specs_dict[r[1][0]]

36. respec = tf.squeeze(tf.transpose(spectograms, [1, 2, 0]))

37. target.append(label)

38. specs.append(respec)

39.

40. specs = np.array(specs)

41. target = np.array(target)

42.

43. # Split data into train and test sets

44. train_examples, test_examples, train_labels, test_labels = train_test_split(specs, target, test_size=0.33, random_state=42)

45.

46. # Transform data into TensorFlow datasets

47. train_dataset = tf.data.Dataset.from_tensor_slices((train_examples, train_labels))

48. test_dataset = tf.data.Dataset.from_tensor_slices((test_examples, test_labels))

49.

50. # Set AUTOTUNE for performance optimization

51. AUTOTUNE = tf.data.AUTOTUNE

52. train_dataset = train_dataset.prefetch(buffer_size=AUTOTUNE)

53.

54. # Define batch size and shuffle buffer size

55. BATCH_SIZE = 64

56. SHUFFLE_BUFFER_SIZE = 100

57.

58. train_dataset = train_dataset.batch(BATCH_SIZE)

59.

60. # Model definition (MobileNetV2)

61. def _conv_block(inputs, filters, kernel, strides):

62. """Convolution Block

63. This function defines a 2D convolution operation with BN and ReLU6 activation.

64. """

65.

66. x = tf.keras.layers.Conv2D(filters, kernel, padding='same', strides=strides)(inputs)

67. x = tf.keras.layers.BatchNormalization()(x)

68. return tf.nn.relu6(x)

69.

70. def _bottleneck(inputs, filters, kernel, t, s, r=False):

71. """Bottleneck

72. This function defines a basic bottleneck structure.

73. """

74.

75. tchannel = inputs.shape[-1] * t

76.

77. x = _conv_block(inputs, tchannel, (1, 1), (1, 1))

78.

79. x = tf.keras.layers.DepthwiseConv2D(kernel, strides=(s, s), depth_multiplier=1, padding='same')(x)

80. x = tf.keras.layers.BatchNormalization()(x)

81. x = tf.nn.relu6(x)

82.

83. x = tf.keras.layers.Conv2D(filters, (1, 1), strides=(1, 1), padding='same')(x)

84. x = tf.keras.layers.BatchNormalization()(x)

85.

86. if r:

87. x = tf.keras.layers.add([x, inputs])

88. return x

89.

90. def _inverted_residual_block(inputs, filters, kernel, t, strides, n):

91. """Inverted Residual Block

92. This function defines a sequence of 1 or more identical layers.

93. """

94.

95. x = _bottleneck(inputs, filters, kernel, t, strides)

96.

97. for i in range(1, n):

98. x = _bottleneck(x, filters, kernel, t, 1, True)

99.

100. return x

101.

102. def simple_cnn_3_blocks(input_shape, n_output):

103. """Simple CNN Model with 3 Blocks

104. """

105.

106. inputs = tf.keras.layers.Input(input_shape)

107.

108. x = _conv_block(inputs, 32, (3, 3), strides=(2, 2))

109. x = _inverted_residual_block(x, 16, (3, 3), t=1, strides=1, n=1)

110. x = _inverted_residual_block(x, 24, (3, 3), t=6, strides=2, n=2)

111. x = _inverted_residual_block(x, 32, (3, 3), t=6, strides=2, n=3)

112.

113. x = tf.keras.layers.Flatten()(x)

114. x = tf.keras.layers.Dense(64, activation='relu')(x)

115. outputs = tf.keras.layers.Dense(n_output)(x)

116.

117. return tf.keras.Model(inputs, outputs)

118.

119. # Define input shape and number of outputs

120. input_shape = (train_examples.shape[1], train_examples.shape[2], train_examples.shape[3])

121. n_output = _labels.shape[1] - 1

122.

123. # Create and compile the model

124. model = simple_cnn_3_blocks(input_shape, n_output)

125. optimizer = tf.keras.optimizers.Adam(0.01)

126. model.compile(loss='mse', optimizer="adam", metrics=[tf.keras.metrics.RootMeanSquaredError()])

127.

128. # Define callbacks for saving checkpoints and early stopping

129. now = datetime.datetime.now().strftime("%Y%m%d-%H%M%S")

130. name_experiment = f"{experiment_name}-{now}"

131. logdir = os.path.join("../logs1", name_experiment)

132. tensorboard_callback = tf.keras.callbacks.TensorBoard(logdir)

133. checkpoint_callback = tf.keras.callbacks.ModelCheckpoint("../checkpoints/custom_cnn_simple", save_freq=500, monitor="val_root_mean_squared_error")

134.

135. checkpoint_callback = tf.keras.callbacks.ModelCheckpoint(

136. "../checkpoints/custom_cnn_simple",

137. save_freq=500,

138. monitor="val_root_mean_squared_error",

139. save_best_only=True,

140. mode="min"

141. )

142.

143. early_stopping_callback = tf.keras.callbacks.EarlyStopping(

144. monitor='val_loss',

145. patience=1000,

146. restore_best_weights=True

147. )

148.

149. callbacks_list = [checkpoint_callback, early_stopping_callback]

150.

151. # Train the model

152. history = model.fit(

153. train_dataset,

154. epochs=5000,

155. validation_data=(test_examples, test_labels),

156. callbacks=callbacks_list

157. )

158.

159. # Save the trained model

160. model.save(f"../saved_model/{name_experiment}_As_Sb")

161.

162. # Plot training history

163. def plot_history(history):

164. hist = pd.DataFrame(history.history)

165. hist['epoch'] = history.epoch

166.

167. plt.figure()

168. plt.xlabel('Epoch')

169. plt.ylabel('Mean Square Error [$MPG^2$]')

170. plt.plot(hist['epoch'], hist['root_mean_squared_error'], label='Train Error')

171. plt.plot(hist['epoch'], hist['val_root_mean_squared_error'], label='Val Error')

172.

173. plt.legend()

174. plt.show()

175.

176. plot_history(history)

177.
